# Supplementary material for: Motives for early retirement of self-employed GPs in the Netherlands: a comparison of two time periods
Source: PubMed Central journal article supplement (PMC3541202; doi:10.1186/1472-6963-12-467), 2012-12-18
Supplement: 1472-6963-12-467-S1.pdf [file 1472-6963-12-467-S1.pdf]

**Additional file 1. Probability of leaving general practice within one year, by age, gender and period.**

| Age    | 1998-2002 |       |       |       | 2003-2007 |       |       |       | $\Delta$ |       |        |       |
|--------|-----------|-------|-------|-------|-----------|-------|-------|-------|----------|-------|--------|-------|
|        | <=54      | 55-59 | 60-64 | Total | <=54      | 55-59 | 60-64 | Total | <=54     | 55-59 | 60-64  | Total |
| Male   | 1.5%      | 7.4%  | 35.2% | 3.3%  | 0.7%      | 5.2%  | 21.3% | 3.0%  | -0.8%    | -2.2% | -13.9% | -0.3% |
| Female | 2.3%      | 11.4% | 34.8% | 2.7%  | 1.3%      | 5.3%  | 21.3% | 1.7%  | -1.0%    | -6.1% | -13.4% | -1.0% |
| Total  | 1.7%      | 7.6%  | 35.1% | 3.2%  | 0.9%      | 5.2%  | 21.3% | 2.7%  | -0.8%    | -2.4% | -13.9% | -0.5% |

Source: Van der Velden LFJ, Batenburg RS: *Stoppen als huisarts: trends in aantallen en percentages. Een analyse van de huisartsenregistratie over de periode 1998-2007.* [Leaving general practice: Trends in numbers and percentages. An analysis of the GP registration for the period 1998-2007.]. Utrecht: NIVEL; 2009.
